# Supplementary material for: Music and Dance in respiratory disease management in Uganda: A qualitative study of patient and healthcare professional perspectives
Source: medRxiv preprint, doi:10.1101/2021.04.27.21255985, version 1 (2021-04-28)
Supplement: Observation sheet [file 255985_file04.docx]

Kupumua Structured Observation Sheet 1

Trial session:

Date:

Observer:

Location:

People present:

Observation of an active session (could be singing, dancing, PR or PR plus music/dance)

| Observation | Session type: |
| --- | --- |
| 1. Body language |  |
| 1. Facial expressions |  |
| 1. Speech/expression |  |
| 1. Interactions between peers |  |
| 1. Interactions with staff |  |
| 1. Physical involvement with music, singing, dancing |  |
| 1. Disease related behaviour (short of breath, coughing, fatigue, resting periods, |  |
| 1. Role within the group. Passive/active. Lead/follow. |  |
| 1. Reflexive researcher responses |  |
